# Supplementary material for: Hematological and biochemical outcomes of Leishmania infantum infection in the South American coati (Nasua nasua) in an endemic area of visceral leishmaniasis in Central Western Brazil
Source: Research Square preprint supplement (doi:10.21203/rs.3.rs-8099969/v1), 2025-11-25
Supplement: Supplementary file 1 [file 393a0bfab31e5f8179b3198d.xlsx]

## Sheet: Planilha1
Article title	Hematological and biochemical outcomes of Leishmania infantum infection in the South American coati (Nasua nasua) in an endemic area of visceral leishmaniasis in Central Western Brazil
Journal name	Acta Parasitologica
Author names	Gabriel Carvalho de Macedo, André Luiz Rodrigues Roque, Filipe Martins Santos, Wanessa Gomes Teixeira Barreto, Carina Elisei de Oliveira, William Assis de Oliveira, Grasiela Edith de Oliveira Porfírio, Andreza Castro Rucco, Gisele Brasiliano de Andrade, Alanderson Rodrigues da Silva, Nayara Yoshie Sano, Julia Gindri Bragato Pistori, Samanta Cristina das Chagas Xavier, Ana Maria Jansen, Heitor Mir…
Corresponding author's affiliation	Laboratory of Trypanosomatid Biology, Oswaldo Cruz Institute, Rio de Janeiro, Rio de Janeiro, Brazil Department of Environmental Sciences and Agricultural Sustainability, Dom Bosco Catholic University, Campo Grande, Mato Grosso do Sul, Brazil Department of Ecology and Conservation, Federal University of Mato Grosso do Sul, Campo Grande, Mato Grosso do Sul, Brazil
Corresponding author's email	carvalhodemacedo@gmail.com
Online Resource 1. Clinical presentations observed in South American coatis (Nasua nasua) sampled in forest fragments of Campo Grande, Mato Grosso do Sul, Midwest Brazil, from March 2018 to April 2019.
	Clinical presentation	Total (n = 128)	Leishmania infantum infection (n = 49)	Uninfected (n = 79)
Clinical symptoms compatible with CVL	Paw pad hyperkeratosis	40 (31.2%)	9 (18.4%)	31 (39.2%)
	Lymphadenopathy	10 (7.8%)	3 (6.1%)	7 (8.9%)
	Alopecia	4 (3.1%)	1 (2%)	3 (3.8%)
	Desquamation	3 (2.3%)	1 (2%)	2 (2.5%)
Other clinical symptoms observed	Wounds	42 (32.8%)	20 (40.8%)	22 (27.8%)
	Scars	35 (27.3%)	11 (22.4%)	24 (30.4%)
	Sialorrhea	11 (8.6%)	5 (10.2%)	6 (7.6%)
	Genital swelling	10 (7.8%)	5 (10.2%)	5 (6.3%)
	Bone fracture	6 (4.7%)	2 (4.1%)	4 (5.1%)
	Obesity	6 (4.7%)	4 (8.2%)	2 (2.5%)
	Cryptorchid	2 (1.6%)	0 (0%)	2 (2.5%)
	Diarrhea	3 (2.3%)	1 (2%)	2 (2.5%)
	Limb swelling	1 (0.8%)	1 (2%)	0 (0%)
	Gingivitis	1 (0.8%)	1 (2%)	0 (0%)
	Cataract	1 (0.8%)	0 (0%)	1 (1.3%)
	Nasal secretion	1 (0.8%)	0 (0%)	1 (1.3%)
	Nipple swelling	1 (0.8%)	0 (0%)	1 (1.3%)
No clinical signs		34 (26.6%)	14 (28.8%)	20 (25.3%)
CVL: Canine Visceral Leishmaniasis
